# Supplementary material
Source: Springer Nature journal article supplement (https://www.springermedizin.de/resource/supplementary/13018_2009_172_MOESM1_ESM.pdf/9636468)

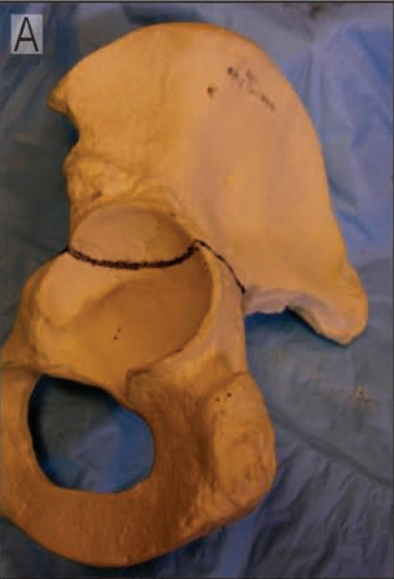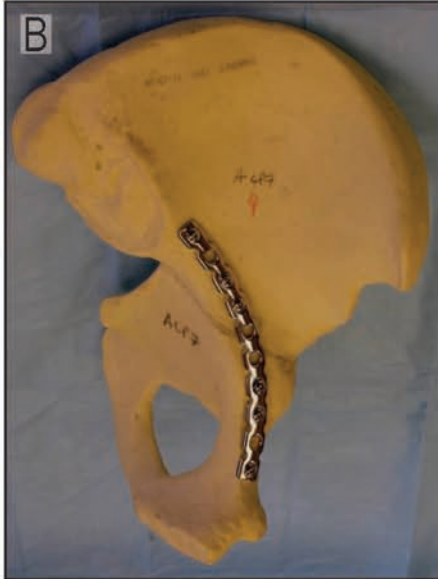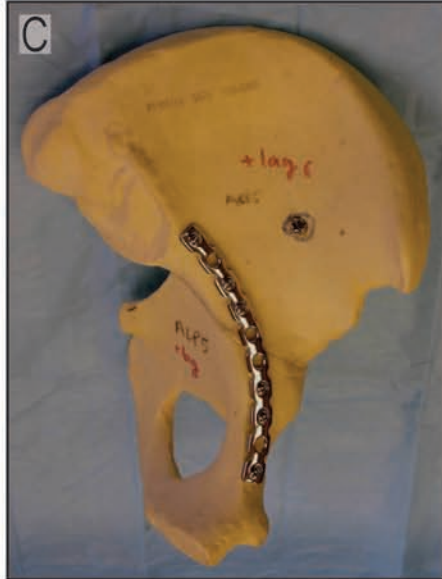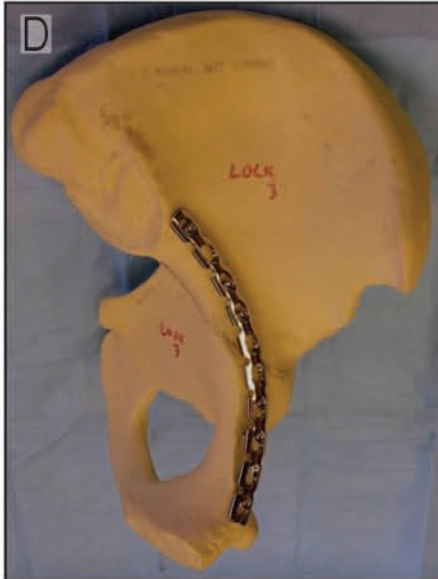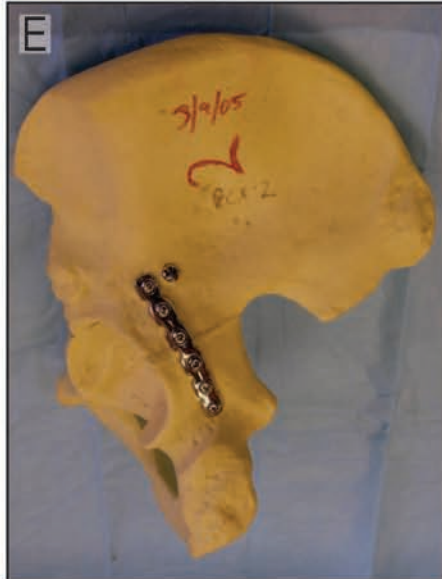

Supplement: MOESM1 [file 9636468]
